# Supplementary material
Source: PubMed Central journal article supplement (PMC5920513)
Supplement: NIHMS861703-supplement-1.pdf [file NIHMS861703-supplement-1.pdf]

# EGFR and HER2 Activate Rigidity Sensing Only on Rigid Matrices

Mayur Saxena<sup>1,\*</sup>, Shuaimin Liu<sup>2,\*</sup>, Bo Yang<sup>3</sup>, Cynthia Hajal<sup>2</sup>, Rishita Chander<sup>3</sup>, Junqiang Hu<sup>2</sup>, Haguy Wolfenson<sup>4,5,#</sup>, James Hone<sup>2,#</sup>, and Michael P. Sheetz<sup>3,4,#</sup>

<sup>1</sup>Department of Biomedical Engineering, Columbia University, New York, New York 10027, USA

<sup>2</sup>Department of Mechanical Engineering, Columbia University, New York, New York 10027, USA

<sup>3</sup>Mechanobiology Institute, National University of Singapore, Singapore 117411, Singapore

<sup>4</sup>Department of Biological Sciences, Columbia University, New York, New York 10027, USA

<sup>5</sup>Current address: Department of Genetics and Developmental Biology, The Ruth and Bruce Rappaport Faculty of Medicine, The Technion – Israel Institute of Technology, Haifa, Israel 31096

\*These authors have made equal contributions

#Corresponding author

## Supplementary Discussion

In this study, we show that EGFR and HER2 play a key role in rigidity sensing and directly affect CU formation. We find that during cell spreading, the formation of CUs is dramatically inhibited by blocking EGFR activity with the consequence that cell spread area is substantially decreased. The inhibition of SFK activity has a similar effect on CU activity and on spread area, which is consistent with earlier reports that Src kinase is responsible for non-ligand dependent activation of EGFR<sup>1,2</sup>. Furthermore, SFK mediated tyrosine phosphorylation can also activate overexpressed HER2 to substitute for EGFR in this pathway and enable rigidity sensing by the cell.

There is an extensive literature on EGFR because it has a major role in many cancers and growth abnormalities<sup>3-5</sup>. Our findings indicate that the non-ligand dependent activation of EGFR affects CU activity which we previously showed was important for rigidity sensing<sup>6,7</sup>. A simple hypothesis to explain the results is that EGFR is a critical part of a positive feedback system that is activated by rigid matrices. Since only a few studies of EGFR have been done on soft

surfaces<sup>8</sup>, the lack of EGFR involvement in cell function on soft surfaces has not been well characterized. However, elements of the process can be understood.

Ligand-independent activation of EGFR is linked to Src activation of EGFR but only on rigid surfaces<sup>9</sup>. Our studies are consistent with SFK activation of EGFR that is dependent upon rigidity sensing and indicates that the recruitment of pEGFR to rigid adhesion sites depends upon SFK. Not only do the antibodies to the Src phosphorylation site on EGFR localize better to the adhesions than does the antibody to the autophosphorylation site, but also the inhibition of SFK has the same effect on spreading and CU activity as does the inhibition of EGFR kinase.

Our findings also highlight the transient nature of the EGFR effects. It is known that addition of EGF results in a transient (~1-3 minutes) activation of the EGFR that causes endocytosis and transport to the nucleus<sup>10</sup>. This addition of EGF to spread cells causes a dramatic increase in CU activity concomitant with the commonly observed rapid spreading. This effect of EGF is dependent upon myosin contractility and substrate rigidity, implying that there may be a positive feedback cycle for EGFR recruitment and activation of CU formation. The CUs are also dynamic since the contraction-relaxation cycle lasts only a minute<sup>11</sup>; and in stably spread cells, the level of CU activity is both very low and intermittent. However, on stiff surfaces, the CU activity causes the stabilization of adhesions and growth for many fibroblasts. If EGFR is an integral part of the system that causes CU assembly at adhesion sites, then it could also only transiently interact with the adhesions. Indeed, we find that the ratio of pEGFR to paxillin decreases upon adhesion maturation.

## References

1. Andreev, J. *et al.* Src and Pyk2 mediate G-protein-coupled receptor activation of epidermal growth factor receptor (EGFR) but are not required for coupling to the mitogen-activated protein (MAP) kinase signaling cascade. *J. Biol. Chem.* **276**, 20130–20135 (2001).

2. Moro, L. *et al.* Integrin-induced epidermal growth factor (EGF) receptor activation requires c-Src and p130Cas and leads to phosphorylation of specific EGF receptor tyrosines. *J. Biol. Chem.* **277**, 9405–9414 (2002).
3. Normanno, N. *et al.* Epidermal growth factor receptor (EGFR) signaling in cancer. *Gene* **366**, 2–16 (2006).
4. Tang, X. *et al.* Epidermal growth factor receptor abnormalities in the pathogenesis and progression of lung adenocarcinomas. *Cancer Prev. Res. Phila. Pa* **1**, 192–200 (2008).
5. Brand, T. M., Iida, M., Li, C. & Wheeler, D. L. The nuclear epidermal growth factor receptor signaling network and its role in cancer. *Discov. Med.* **12**, 419–432 (2011).
6. Ghassemi, S. *et al.* Cells test substrate rigidity by local contractions on submicrometer pillars. *Proc Natl Acad Sci U A* **109**, 5328–33 (2012).
7. Wolfenson, H. *et al.* Tropomyosin controls sarcomere-like contractions for rigidity sensing and suppressing growth on soft matrices. *Nat Cell Biol* **18**, 33–42 (2016).
8. Kim, J.-H. & Asthagiri, A. R. Matrix stiffening sensitizes epithelial cells to EGF and enables the loss of contact inhibition of proliferation. *J Cell Sci* **124**, 1280–1287 (2011).
9. Wang, Y. *et al.* Pseudopodium-enriched atypical kinase 1 regulates the cytoskeleton and cancer progression [corrected]. *Proc Natl Acad Sci U A* **107**, 10920–5 (2010).
10. Xu, K.-P., Yin, J. & Yu, F.-S. X. SRC-family tyrosine kinases in wound- and ligand-induced epidermal growth factor receptor activation in human corneal epithelial cells. *Invest. Ophthalmol. Vis. Sci.* **47**, 2832–2839 (2006).
11. Iskratsch, T. *et al.* FHOD1 Is Needed for Directed Forces and Adhesion Maturation during Cell Spreading and Migration. *Dev Cell* **27**, 545–59 (2013).

Supplementary Figure 1

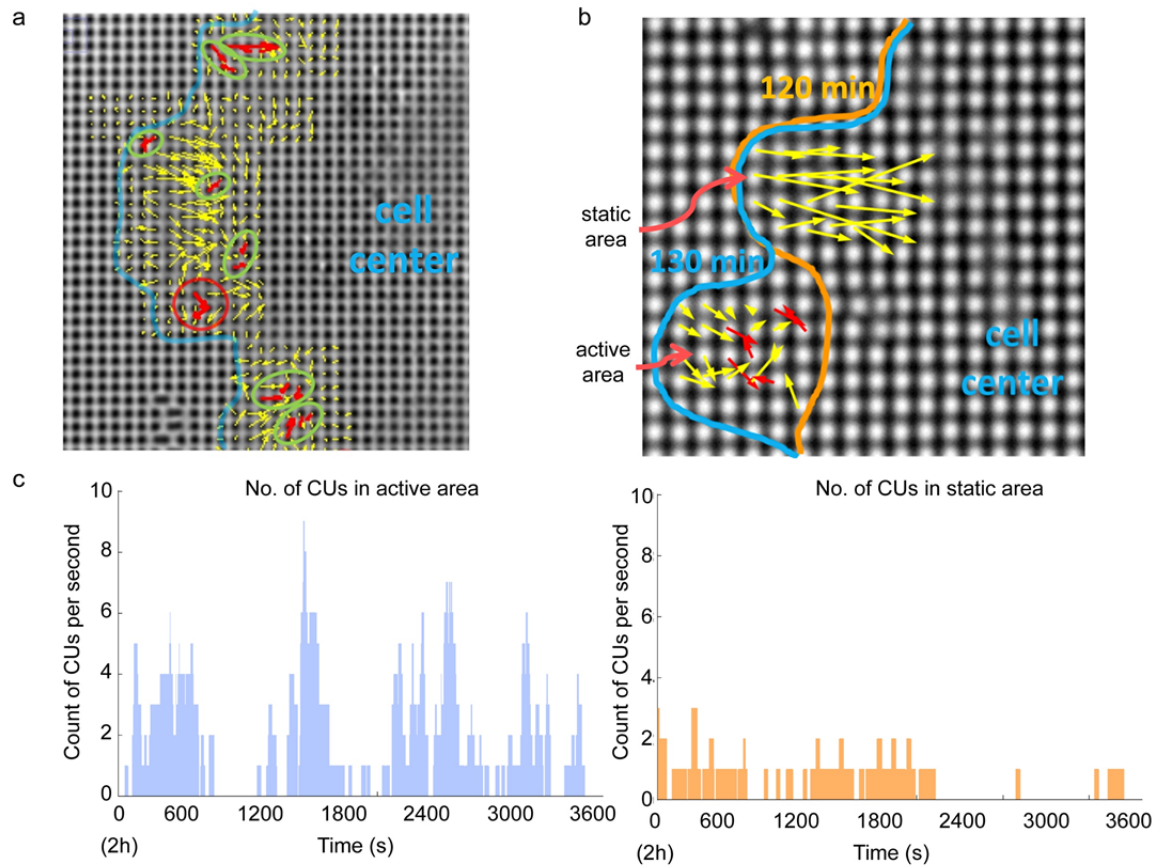

81

82 **Supplementary Figure 1** CUs detection method and definition of active area. **a**, actual CUs  
 83 detected in the active area by the automated program. Shown is a frame from a time-lapse movie  
 84 of a cell spreading on FN-coated 17.2 kPa pillars. Arrows represent pillar movement: red,  
 85 detected CUs; yellow, non-CUs. Green circles marked correctly identified CU; red circle marked  
 86 incorrectly detected CU. Success rate=97.47+/-0.75%. Cell edge marked in blue. **b**, cell edge  
 87 marked in orange and blue correspond to time 120 min and 130 min respectively. Active area is  
 88 defined as the area where the cell edge moves outwards. **c**, number of CUs per second of the cell  
 89 in **b** monitored from 2h to 3h. The left and the right plots show the number of CUs in the active  
 90 and static area, respectively.

91

Supplementary Figure 2

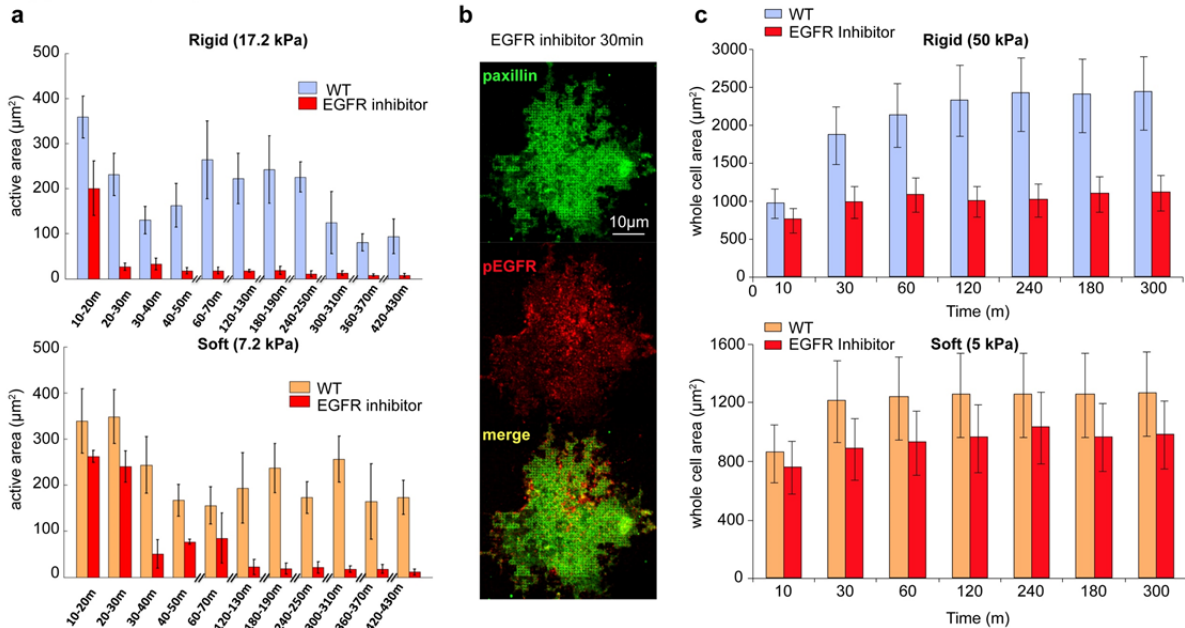

**Supplementary Figure 2** Active area and pEGFR distribution disrupted by EGFR inhibitor and whole cell area on FN coated flat PDMS substrates. **a**, active area was measured in intervals of 10 minutes. Cells with and without EGFR inhibitor treatment in medium lacking serum were monitored on rigid (top panel) and soft (bottom panel) pillar substrates for over 7 hours. **b**, phosphorylated EGFR lost co-localization with paxillin with EGFR inhibitor (gefitinib, 10 nM) treatment on rigid pillar substrate. **c**, Whole cell area of WT MEFs when spread on FN coated soft and stiff flat PDMS substrate with or without EGFR inhibitor. Error bars show standard error of the mean.

Supplementary Figure 3

**a**

Cos-7 + EGFP-myosin IIA

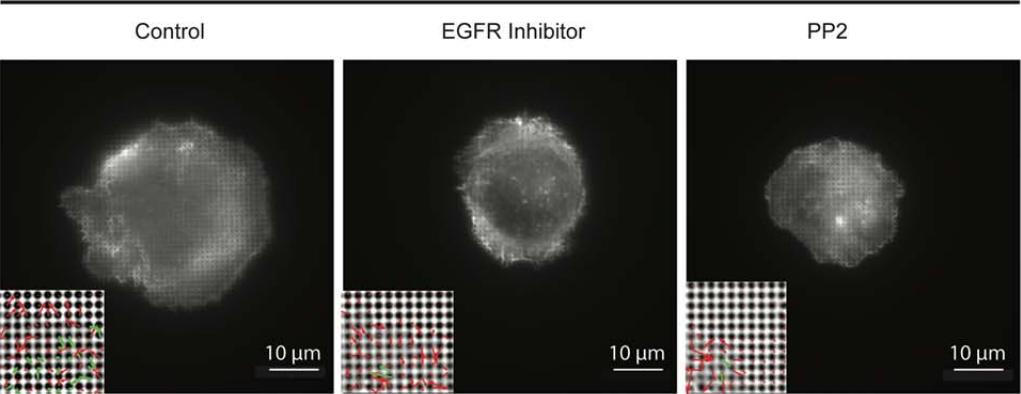

**b**

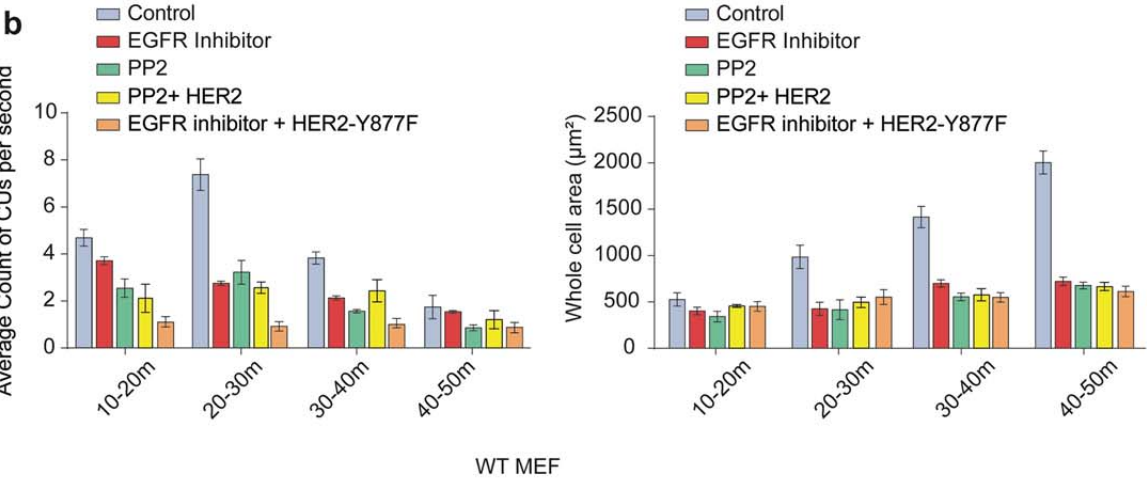

**c**

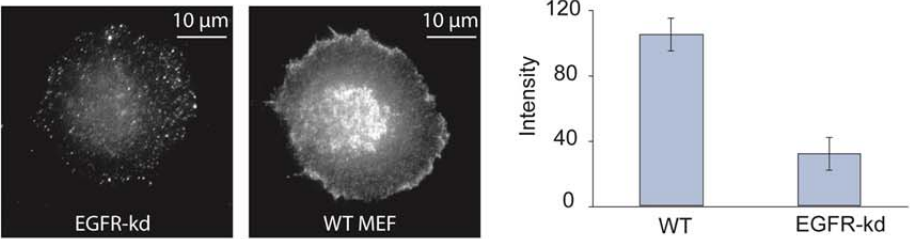

**d**

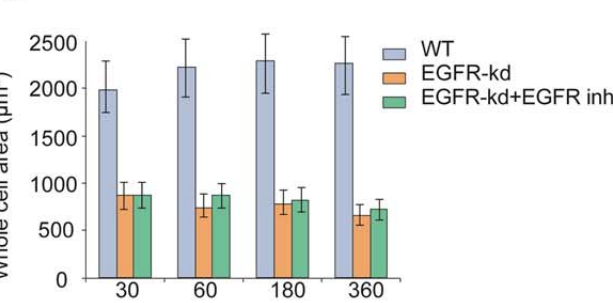

**Supplementary Figure 3** Confirmation of EGFR and HER2 involvement in Cos-7 and WT MEFs using small molecule inhibitors and inactive HER2 point mutant. **a**, Cos-7 cells expressing myosin IIA were spread on rigid pillars with or without EGFR and/or HER2 inhibitor or PP2. Further, Cos-7 cells were transfected with HER2 mutant (Y877F) in combination with the mentioned inhibitors. The arrows in the inset show pillar displacements. **b**, Whole cell area and contractile unit count for the first hour of spreading. **c**, WT MEFs and cells with knock-down of EGFR stained for total EGFR. Average total intensity is also shown to signify the extent of knock-down. 22 cells were analyzed for each case. **d**, Whole cell area of EGFR knock-down cells as a function of time. 18 cells were analyzed from 3 independent experiments. Error bars show standard error of the mean.

Supplementary Figure 4

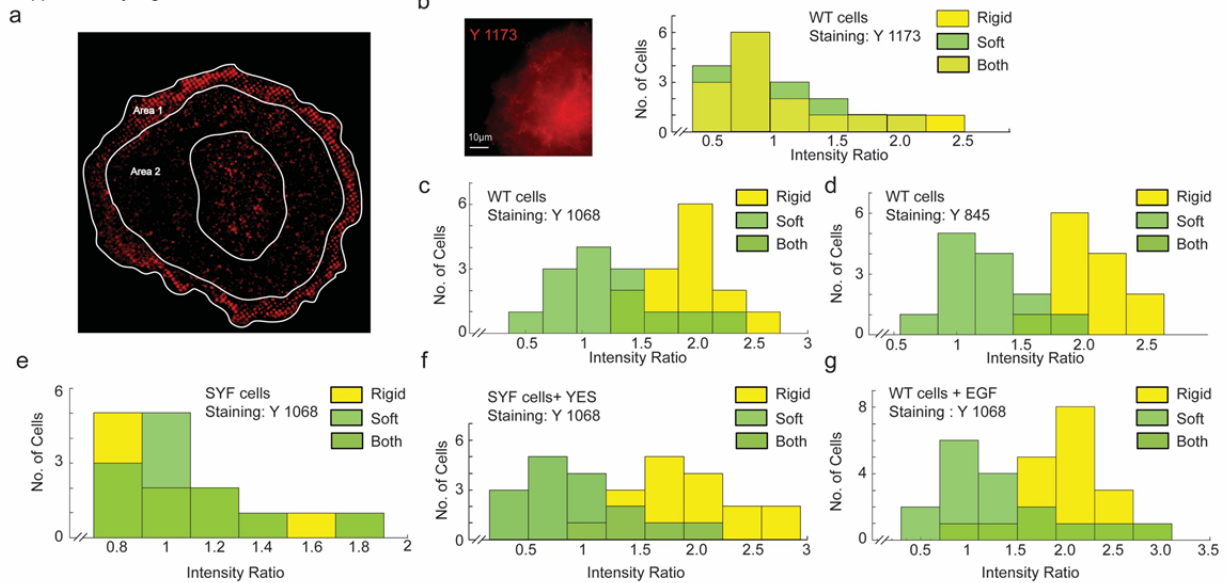

**Supplementary Figure 4** Quantification of pEGFR distribution at cell edges. **a**, Average Intensity of pEGFR was calculated in Area 1 and Area 2 as shown. Area 1 is defined as a band across the cell edge with a width of ~4-5 μm. Intensity ratio is calculated by dividing the mentioned average from Area 1 by that of Area 2. This calculated Intensity ratio is a measure of the peripheral localization of pEGFR. In the following plots intensity ratio is plotted for the mentioned cells on stiff and soft substrates. **b**, WT cells stained for pEGFR Y1173. **c**, WT cells stained for pEGFR Y1068. **d**, WT cells stained for pEGFR Y845. **e**, SYF cells stained for pEGFR Y1068. **f**, SYF stably expressing YES stained for pEGFR Y1068. **g**, WT cells stimulated with EGF and then stained for pEGFR Y1068.

Supplementary Figure 5

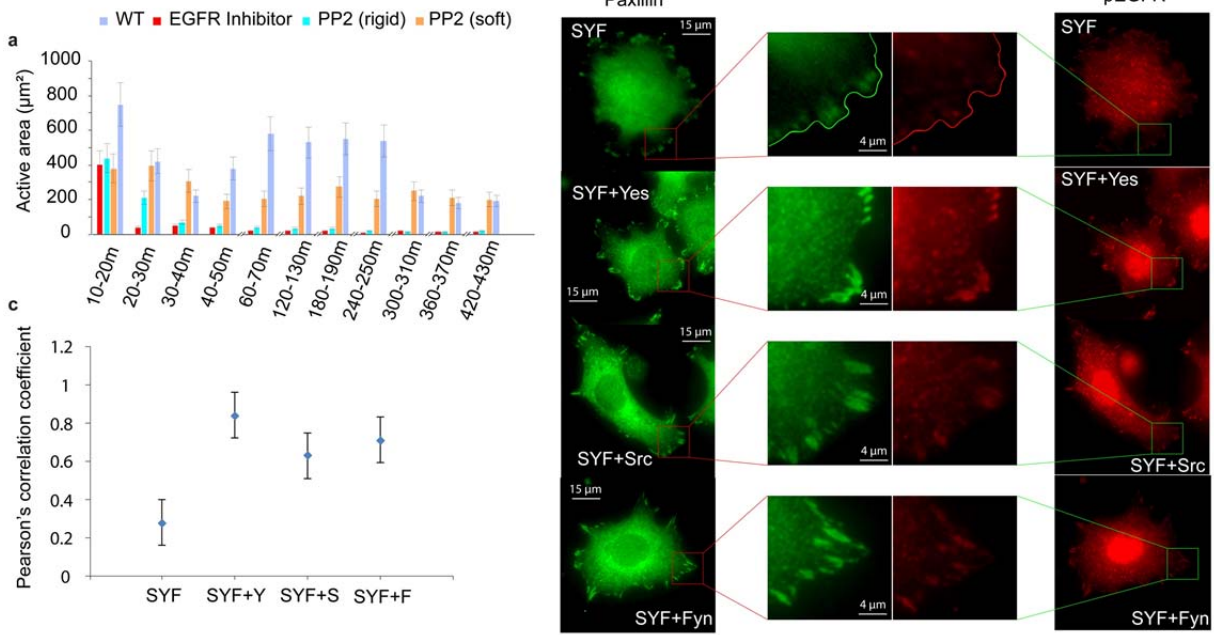

**Supplementary Figure 5** Establishing the connection between SFKs and EGFR in cell spreading and adhesions. **a**, Active area of WT MEFs on stiff and soft pillars, with or without PP2. **b**, SYF cells and respective knock ins stained for Paxillin and pEGFR after 30 min of spreading on glass. **c**, Pearson correlation coefficient between paxillin and pEGFR in peripheral zone of cells as defined by Area 1 in Supplementary Figure 4a.  $n > 10$ . 3 independent experiments. Error bars represent standard error of the mean.

Supplementary Figure 6

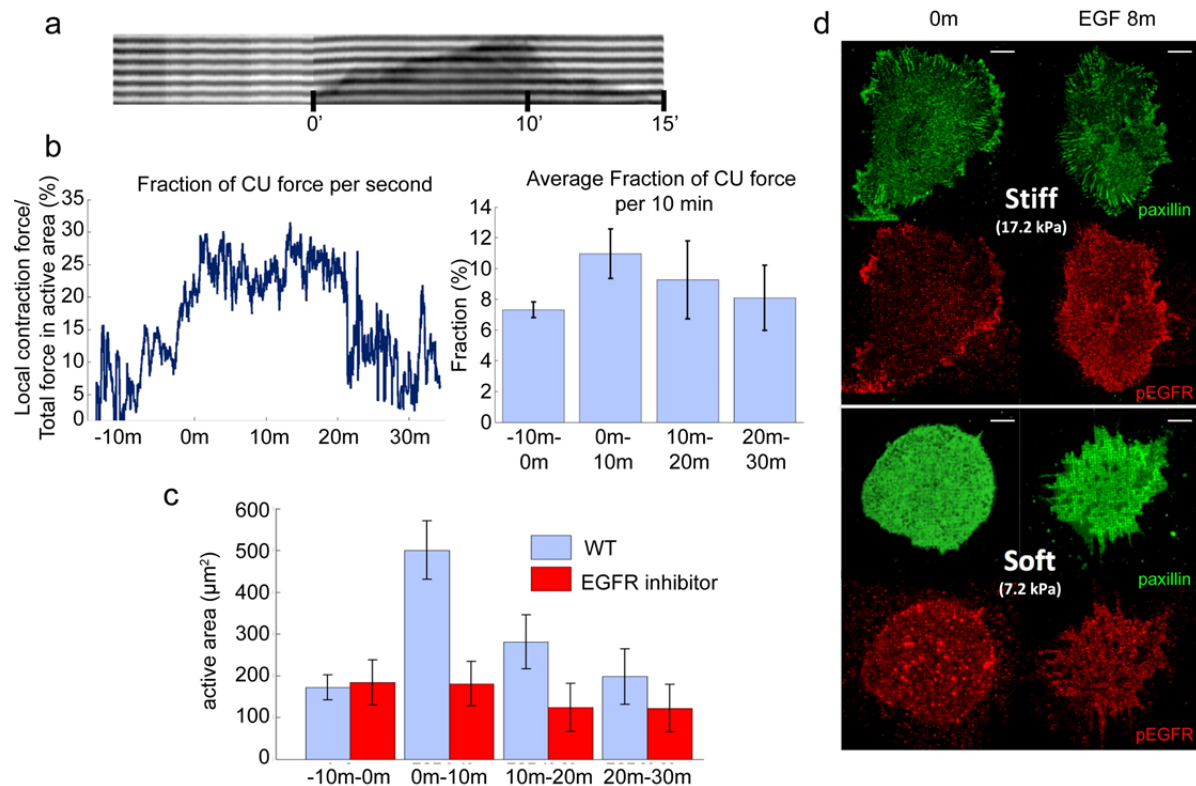

133

134 **Supplementary Figure 6** EGF stimulation of cell edge and CU activity. **a**, Kymograph of cell

135 edge after EGF addition at t=0 minutes. **b**, Plot of fraction of contractile unit force in total force

136 exerted by the active area of a cell upon EGF addition. **c**, Active area of the cell with or without

137 EGFR inhibitor when stimulated by EGF. **d**, Staining for paxillin and phosphorylated EGFR on

138 rigid and soft substrates before (0 min) and after (8 min) addition of EGF. Scale bar is 10  $\mu\text{m}$ .

139 Error bars show standard error of the mean.
